# Supplementary material
Source: ML conference proceedings conference paper supplement (https://openreview.net/forum?id=esTPCUJZhe)
Supplement: supplementary_material [file attachment]

## 806 Appendix

### 807 A Details from Section 3

808 *Proof of Theorem 3.1.* Let  $A$  be a Pareto-optimal algorithm of robustness  $r$ , and consistency  $c(r)$ .  
 809 We will show that for any fixed  $\epsilon > 0$ , there exists a sequence  $\sigma$  and a prediction  $\hat{p}$  such that  
 810  $\eta = |\hat{p} - p_\sigma^*| \leq \epsilon$ , and  $A$  satisfies Definition 3.1. Since  $A$  is Pareto-optimal, there exists a non-empty  
 811 set of sequences  $\Sigma_c$ , such that for all  $\sigma_c \in \Sigma_c$ , if  $A$  is given as prediction  $p_{\sigma_c}^*$ , then

$$\frac{p_{\sigma_c}^*}{A(\sigma_c)} = c(r).$$

812 As shown in [19] we can assume, without loss of generality, that every  $\sigma_c$  is increasing, i.e., it is  
 813 of the form  $\sigma_c = p_1, \dots, p_k, p_{\sigma_c}^*$  with  $p_i > p_j$ , for all  $i < j$ , and  $p_{\sigma_c}^* > p_k$ . We define  $\Sigma$  to be the  
 814 co-domain of the following function,  $f$ :

$$f: \Sigma_c \rightarrow \Sigma \text{ such that } f(\sigma_c) = \begin{cases} \sigma_c & \text{if } |p_{\sigma_c}^* - p_k| \leq \epsilon, \\ p_1, \dots, p_k, p_{\sigma_c}^* - \epsilon, p_{\sigma_c}^* & \text{otherwise.} \end{cases} \quad (\text{A.1})$$

815 Given a  $\sigma \in \Sigma$ , let  $n = |\sigma| - 1$ , and let  $x_n$  be the fraction exchanged by  $A$ . Since  $A$  is  $r$ -robust, it  
 816 needs to account for the scenario in which the adversary chooses to drop all rates to 1 after exchanging  
 817 at the rate  $p_n$ . Thus,  $x_n$  must satisfy

$$\frac{p_n}{s_n + p_n \cdot x_n + 1 - x_n - w_n} \leq r,$$

818 or equivalently,

$$x_n \geq \frac{p_n - r \cdot (s_n + 1 - w_n)}{r \cdot (p_n - 1)}. \quad (\text{A.2})$$

819 Define  $\omega$  to be the RHS of (A.2). Suppose first, that there exists a sequence  $\sigma \in \Sigma$  for which  $A$   
 820 exchanges  $x_n = \omega$ . In this case, if  $A$  is given a prediction  $\hat{p} = p_\sigma^*$ , then for the the sequence  
 821  $\sigma_r = \sigma[1, n]$  we have that  $|\hat{p} - p_{\sigma_r}^*| \leq \epsilon$ , and:

$$\frac{p_{\sigma_r}^*}{A(\sigma_r)} = \frac{p_n}{s_n + p_n \cdot \omega + 1 - \omega - w_n} = r,$$

822 and the proof is complete in this case.

823 It thus remains to consider the case that for all  $\sigma \in \Sigma$ ,  $x_n > \omega$ . Let  $x_{n+1}$  be the amount exchanged by  
 824  $A$  at rate  $p_\sigma^*$ . We define an online algorithm  $A'$ , whose statement is given in Algorithm 3. Intuitively,  
 825 while the rate is below  $p_\sigma^*$ ,  $A'$  makes the same decisions as  $A$ . If the rate is between  $p_\sigma^* - \epsilon$  and  $p_\sigma^*$ ,  
 826  $A'$  exchanges  $\omega$ . If the rate is precisely  $p_\sigma^*$   $A'$  exchanges  $x_n$  plus what  $A$  did not exchange on rates  
 827 which were between  $p_\sigma^* - \epsilon$  and  $p_\sigma^*$ . Finally,  $A'$  makes the same decisions as  $A$  for all rates that  
 828 exceed  $p_\sigma^*$ . We will show that  $A'$  has robustness at most  $r$  and consistency  $c_{A'}$  such that  $c_{A'} < c(r)$ ,  
 829 which contradicts that  $A$  is Pareto-optimal.

830 We first show that  $A'$  is  $r$ -robust. Let  $\sigma'$  be an input sequence and  $\hat{p}$  a prediction given to  $A'$ , we will  
 831 show that  $p_{\sigma'}^* \leq rA(\sigma')$ . If  $p_{\sigma'}^* < \hat{p} - \epsilon$ , then has  $A'$  made the same decisions as  $A$ , hence remains  
 832  $r$ -robust. If  $\hat{p} - \epsilon < p_{\sigma'}^* < \hat{p}$ , then by definition of  $\omega$ ,  $A'$  is guaranteed to be  $r$ -robust. Last, if  $p_{\sigma'}^* \geq \hat{p}$ ,  
 833 then  $A'$  achieves a strictly better profit than  $A$ .

834 It remains to show that  $A'$  has consistency strictly smaller than  $c(r)$ . To this end, it suffices to show  
 835 that: (i) for all  $\sigma_c \in \Sigma_c$  it holds that  $\frac{\text{OPT}(\sigma_c)}{A'(\sigma_c)} < c(r)$ , and that (ii) for all  $\sigma' \notin \Sigma_c$  it holds that  
 836  $\frac{\text{OPT}(\sigma_c)}{A'(\sigma_c)} < c(r)$ , assuming that both  $A$  and  $A'$  are given a prediction  $\hat{p} = p_{\sigma'}^*$ .

837 To show (i), note that for  $\sigma' \in \Sigma_c$  it holds that  $\frac{\text{OPT}(f(\sigma'))}{A(f(\sigma'))} < c(r)$ , due to  $A$  exchanging  $x_n > \omega$   
 838 and  $A'$  exchanging  $x_n = \omega$ . If  $f(\sigma') = \sigma'$  (first case in (A.1)) then  $\frac{\text{OPT}(\sigma')}{A(\sigma')} < c(r)$ . Otherwise,  
 839 (second case in (A.1))  $A(\sigma') > A(f(\sigma'))$  hence the same result holds. To show (ii), observe that  
 840  $A'(\sigma') > A(\sigma')$  due to  $A$  exchanging  $x_n > \omega$  and  $A'$  exchanging  $x_n = \omega$ . Hence, by the definition  
 841 of  $\Sigma_c$ , we have

---

**Algorithm 3** Statement of the online algorithm  $A'$ 


---

**Input:** Algorithm  $A$ ,  $\hat{p}$ ,  $\epsilon$

```

1:  $p^* = 1$ ,  $e \leftarrow 0$ 
2: for each rate  $p_i$  in the input sequence do
3:   if  $p_i > p^*$  then
4:      $p^* \leftarrow p_i$ 
5:     if  $p_i < \hat{p} - \epsilon$  then
6:       Exchange the same amount as  $A$ 
7:     else if  $\hat{p} - \epsilon < p_i < \hat{p}$  then
8:       Exchange  $\omega$ 
9:        $e \leftarrow e + x_i - \omega$ 
10:    else if  $p_i = \hat{p}$  then
11:      Exchange  $x_n + e$ 
12:    else
13:      Exchange the same amount as  $A$ 

```

---

$$\frac{\text{OPT}(\sigma_c)}{A'(\sigma_c)} < \frac{\text{OPT}(\sigma_c)}{A(\sigma_c)} < c(r),$$

842 which concludes the proof.  $\square$

## 843 B Details from Section 4

844 In this section, we show how to compute the function  $\Phi$  used in PROFILE (Algorithm 1), for deciding  
845 whether a profile  $F$  is feasible. Recall that we seek a function  $\Phi$  and values  $0 = w_1 \leq \dots \leq w_{l+1} \leq 1$   
846 that satisfy the following sets of constraints.

$$\begin{aligned}
[\beta] \quad & \forall \beta \in [w_i, w_{i+1}) : \frac{\Phi(\beta)}{s_i + \int_{w_i}^{\beta} \Phi(t) dt + 1 - \beta} \leq t_i \\
[w_{i+1}] \quad & \Phi(w_{i+1}) = q_{i+1} \\
[u] \quad & w_i \leq w_{i+1} \leq 1
\end{aligned}$$

847 for each rate interval  $[q_i, q_{i+1})$ .

848 As explained in Section 4, our algorithm builds a function  $\Phi$  and values  $w_i$  in an iterative way. That  
849 is, it processes each set of constraints iteratively, and at each step  $j \in [1, l]$  it builds a function  $\Phi_j$  and  
850 computes values  $w_1, \dots, w_{j+1}$  which satisfy the sets of constraints for all intervals  $[q_i, q_{i+1})$  with  
851  $i \leq j$ . Each function  $\Phi_j$  and the new values  $w_1, \dots, w_{j+1}$  are a function of  $\Phi_{j-1}$  and the previous  
852 values  $w_1, \dots, w_{j+1}$ .

853 We explain an iteration of this process. Suppose that the algorithm is at a step where it has computed  
854  $\Phi_{j-1}$  and values  $w_1, \dots, w_j$  as to satisfy the sets of constraints for the intervals  $[q_i, q_{i+1})$  with  $i < j$ .  
855 Constraint  $[\beta]$  requires us to guarantee a ratio of at least  $t_j$  for every sequence whose maximum rate  
856 is in  $[q_j, q_{j+1})$ . We derive a function which achieves a ratio *equal* to  $t_j$  for such sequences. The  
857 equality is sought, instead of the inequality, in order to minimize utilization. Intuitively, enforcing a  
858 ratio smaller than  $t_j$  would force the algorithm to exchange more money to achieve a bigger profit.  
859 Thus the following constraint

$$\forall \beta \in [w_j, w_{j+1}) : \frac{\Phi(\beta)}{s_j + \int_{w_j}^{\beta} \Phi(t) dt + 1 - \beta} = t_j,$$

860 from which we can obtain the differential equation:

$$\dot{\Phi} = t_j \cdot \Phi - t_j, \tag{B.1}$$

861 which is a separable first order differential equation. We can hence find the unique solution

$$\Phi(\beta) = C \cdot e^{t_j \cdot \beta} + 1.$$

862 We then apply constraint  $[\beta]$ , for an arbitrary  $\beta \in [w_j, w_{j+1})$ , so to find the value of the constant  $C$ ,  
 863 which yields

$$\boxed{\Phi(\beta) = (t_j \cdot (s_j + 1 - w_j) - 1) \cdot e^{t_j \cdot (\beta - w_j)} + 1} \quad (\text{B.2})$$

864 The obtained function is the unique solution to such an equation. We denote  $\rho_j = t_j \cdot (s_j + 1 - w_j)$ .

865 We then use constraint  $[w_{j+1}]$  to find an expression for  $w_{j+1}$ :

$$\boxed{w_{j+1} = \frac{1}{t_j} \ln \left( \frac{q_{j+1} - 1}{\rho_j - 1} \right) + w_j} \quad (\text{B.3})$$

866 Note that  $\Phi(w_j) = \rho_j$ . There are two cases to be analyzed.

867 First, if  $\rho_j > q_j$ , then we can define  $\Phi_j$  as follows:

$$\Phi_j(w) = \begin{cases} \Phi_{j-1}(w) & \text{if } w \in [1, w_j) \\ (t_j \cdot (s_j + 1 - w_j) - 1) \cdot e^{t_j \cdot (\beta - w_j)} + 1 & \text{if } w \in [w_j, w_{j+1}), \end{cases}$$

868 where  $w_{j+1}$  is defined in (B.3). We say that we extend the previous  $\Phi_{j-1}$ . This scenario materializes  
 869 when the algorithm has achieved a profit  $s_j$ , which allows it to not exchange while observing rates  
 870 in  $[q_j, \rho_j]$  and still remain  $t_j$ -competitive. This occurs when  $t_j > t_{j-1}$ , hence it occurs for the  
 871 increasing part of the profile.

872 On the other hand,  $\rho_j < q_j$ , if  $t_j < t_{j-1}$ . If this case occurs, the algorithm has not obtained a  
 873 sufficient profit to be  $t_j$ -competitive when presented with the sequence which continuously increases  
 874 from 1 to  $q_j$ , which is the worst-case sequence as stated in Remark 2.1. As we will show in the  
 875 proof of Theorem 4.1  $w_j$  is the least utilization that can be spent so to satisfy every set of constraints  
 876  $[q_k, q_{k+1})$  with  $k < j$ . To enforce a ratio of  $t_j$  and still minimize utilization, the algorithm must  
 877 exchange a bigger amount when rate  $q_j$  is revealed, since exchanging more at a lower rate would lead  
 878 to a larger utilization. To guarantee a ratio of  $t_j$  for the continuous increasing sequence, the algorithm  
 879 should trade an amount equal to  $w'_j - w_j$ , where  $w'_j$  is obtained from:

$$\frac{q_j}{s_j + q_j \cdot (w'_j - w_j) + 1 - w'_j} = t_j$$

880 and leads to

$$w'_j = \frac{q_j - t_j \cdot (s_j - w_j q_j + 1)}{t_j \cdot (q_j - 1)}.$$

881 We now wish to extend function  $\Phi_{j-1}$ , obtained in the previous iteration, so as to satisfy all constraints  
 882 for interval  $[q_j, q_{j+1})$ . Let  $s'_j = s_j + q_j \cdot (w'_j - w_j)$ , which is the profit obtained by the OTA in the  
 883 worst case where the maximum rate is  $q_j$ . We may express this problem by a new set of constraints,  
 884 which are:

$$\begin{aligned} [\beta] \quad & \forall \beta \in [w'_j, w_{j+1}) : \frac{\Phi(\beta)}{s'_j + \int_{w'_j}^{\beta} \Phi(t) dt + 1 - \beta} \leq t_j, \\ [w_{j+1}] \quad & \Phi(w_{j+1}) = q_{j+1}, \\ [u] \quad & w'_j \leq w_{j+1} \leq 1. \end{aligned}$$

885 Note that this set of constraints is the same as the ones we started with, but  $s_j$  was replaced by  $s'_j$  and  
 886  $w_j$  by  $w'_j$ . Hence, the  $\Phi$  and  $w_{j+1}$  which satisfy the constraints and minimize  $w_{j+1}$  are:

$$\Phi(\beta) = (t_j \cdot (s'_j + 1 - w'_j) - 1) \cdot e^{t_j \cdot (\beta - w'_j)} + 1, \quad (\text{B.4})$$

887

$$w_{j+1} = \frac{1}{t_j} \ln \left( \frac{q_{j+1} - 1}{t_j \cdot (s'_j + 1 - w'_j) - 1} \right) + w'_j. \quad (\text{B.5})$$

888 We can now proceed with the proof for Theorem 4.1.

889 *Proof of Theorem 4.1.* As stated in Remark 2.1, every online strategy will exchange on rates which  
 890 are best-seen so far. We can hence state every strategy as an OTA. It suffices then to prove the  
 891 following: There exists an OTA which respects  $F$  if and only if PROFILE terminates with a value  
 892  $w_{l+1} \leq 1$ .

893 Let  $F$  be a performance profile. The if direction follows directly from the design of PROFILE. It  
 894 suffices to observe that the obtained function  $\Phi_l$  can be used as the threshold function for an OTA  
 895 which respects the profile  $F$ .

896 To prove the only if direction, we will prove that every  $w_i$  obtained by PROFILE is the least utilization  
 897 needed to satisfy all sets of constraints for intervals  $[q_k, q_{k+1})$  for  $k < i$ . In other words, we  
 898 will prove that if A is an OTA, which respects  $F$ , defined by  $\Phi$ , and where  $w'_1, \dots, w'_{l+1}$  are the  
 899 respective utilization levels reached by A when observing rates  $q_1, \dots, q_{l+1}$ , i.e:  $\Phi(w'_i) = q_i$  for each  
 900  $i \in [1, \dots, l+1]$ , then  $w_i \leq w'_i$ . This statement follows, once again, from the design of PROFILE.  
 901 By replacing the inequality constraint in  $[\beta]$  by an equality, we manage to achieve a ratio which is  
 902 exactly the one demanded by the profile, hence reserving budget for futures rates. PROFILE obtains a  
 903 function  $\Phi_l$  which enforces, for each  $i \in [1, l]$  and for each  $q \in [q_i, q_{i+1})$  the equation:

$$\frac{q}{\int_1^{\Phi_l^{-1}(q)} \Phi_l(u) du + 1 - \Phi_l^{-1}(q)} = t_i.$$

904 We conclude that PROFILE minimizes utilization while satisfying every set of constraints, thus proving  
 905 the theorem.  $\square$

906 Figure 3 illustrates PROFILE. Here we observe that for the increasing part of the profile,  $\Phi_i$  with  
 907  $i \in [4, 7]$  extends  $\Phi_{i-1}$  with an exponential function starting at  $w_i$ , where  $\Phi_i(w_i) > \Phi_{i-1}(w_i)$ . Here  
 908 the vertical “jumps” reflect the less stringent requirement in the increasing part (we can afford to  
 909 reserve our budget for later). For the decreasing part of the profile,  $\Phi_i$  with  $i \in [1, 3]$  extends  $\Phi_{i-1}$   
 910 with an exponential function starting at  $w'_i > w_i$  (line 9 in the statement) where  $\Phi_i(w'_i) = \Phi_{i-1}(w_i)$ ,  
 911 which is reflected in the presence of straight lines in Figure 3.

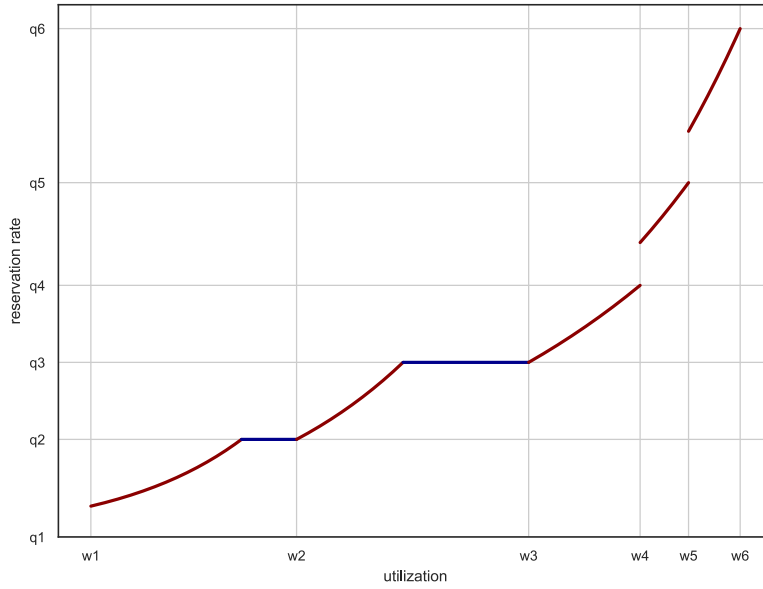

Figure 3: An illustration of PROFILE. Here the profile  $F$  is as follows:  $F([1, 20]) = 7, F([20, 35]) = 5, F([35, 50]) = 3, F([50, 70]) = 3.5$ , and  $F([70, 100]) = 4$

## C Details from Section 5

In this section, we detail the calculations that lead to the value  $w_{i+1}$ , which is the maximum an online algorithm can spend on rate  $p_i$  while ensuring  $r$ -robustness.

The aforementioned  $w_{i+1}$  is the solution to the following optimization problem:

$$\begin{aligned}
 & \max && w && (O_i) \\
 & \text{subj. to} && \\
 & [\beta] && \forall \beta \in [w, 1] : \frac{\Phi(\beta)}{s_i + p_i \cdot (w - w_i) + \int_w^\beta \Phi(t) dt + 1 - \beta} = r, \\
 & [M] && \Phi(1) \geq M, \\
 & [u] && w_i \leq w \leq 1.
 \end{aligned}$$

From constraint  $[\beta]$ , we do the same analysis as in B to find  $\Phi(\beta) = C \cdot e^{r\beta} + 1$ . Once again, to find the constant  $C$  we use constraint  $[\beta]$  for an arbitrary value  $\beta \in [w_{i+1}, 1]$ , which leads to:

$$\Phi(\beta) = (r \cdot (s_i + 1 - p_i w_i + w_{i+1} \cdot (p_i - 1)) - 1) \cdot e^{r(\beta - w_{i+1})} + 1.$$

We then use constraint  $[M]$  to obtain an upper bound on  $w_{i+1}$ :

$$(r \cdot (s_i + 1 - p_i w_i + w_{i+1} \cdot (p_i - 1)) - 1) \cdot e^{r(1 - w_{i+1})} + 1 \geq M,$$

which leads to:

$$w_{i+1} \leq 1 - \frac{1}{r} \ln \left( \frac{M - 1}{r(s_i + 1 - p_i w_i + w_{i+1}(p_i - 1)) - 1} \right).$$

Thus the largest value of  $w_{i+1}$  is the root of the equation

$$w_{i+1} = 1 - \frac{1}{r} \ln \left( \frac{M - 1}{r(s_i + 1 - p_i w_i + w_{i+1}(p_i - 1)) - 1} \right),$$

which can be solved using numerical methods. Let  $\rho$  be the reservation rate for utilization  $w_{i+1}$ , then

$$\rho = \Phi(w_{i+1}) = r \cdot (s_i + 1 - p_i w_i + w_{i+1} \cdot (p_i - 1)).$$

If  $\rho > M$ , then the algorithm has achieved a sufficient profit to guarantee  $r$ -robustness independently of future rates. Hence, to maximize  $w_{i+1}$ , we can safely set it to 1. However, if  $\rho < M$ , then constraint  $[M]$  was saturated, and the algorithm will achieve a performance ratio of  $r$  for every sequence which grows continuously from  $\rho$  until a rate  $p^* \in [\rho, M]$ . Moreover, for every sequence whose maximum rate  $p^* \in [p_i, \rho)$  the algorithm will have a performance ratio smaller than  $r$ .

As explained in Appendix B using constraint  $[\beta]$  with an equality allows us to guarantee a performance ratio of  $r$  minimizing utilization. Observe that to maximize  $w_{i+1}$  we need to minimize the left-over budget to remain  $r$ -robust in the future. We can hence conclude that  $w_{i+1} - w_i$  is indeed the largest amount of money we can exchange at rate  $p_i$  and remain  $r$ -robust.

We will next provide the proof for Theorem 5.1.

*Proof of Theorem 5.1.* We are to prove that ADA-PO is Pareto-Optimal and dominates every other Pareto-Optimal algorithm on any sequence  $\sigma$ .

First, we will prove that ADA-PO is Pareto-Optimal. Let  $r$  be a robustness requirement, and  $c(r)$  the respective consistency. To start with, we prove that ADA-PO is  $r$ -robust. Consider first the (easy) case where  $p^* < \hat{p}$  then ADA-PO assures a performance ratio of  $r$  using the threat-based approach.

Consider then the (harder) case in which  $p^* > \hat{p}$ . Let  $p_i$  be the first rate above  $\hat{p}$  and  $w_{i+1}, \Phi_i$  be the respective solution to problem  $O_i$ . We must prove that no matter how the sequence continues ADA-PO achieves a performance ratio of at least  $r$ . If  $\Phi(w_{i+1}) \geq M$  then a performance ratio of  $r$  is guaranteed, due to  $\frac{M}{s_{i+1} + 1 - w_{i+1}} \leq r$ , from constraint  $[\beta]$ . Suppose then  $\Phi_i(w_{i+1}) < M$ , then by constraints  $[M]$  and  $[u]$  we know that  $w_{i+1} < 1$ . When the next rate  $p_{i+1} > p_i$  is revealed the same analysis can be applied. We thus obtain a non-decreasing sequence of reservation rates  $\Phi_j(p_j)$

for  $j > i$ . For each rate, problem  $O_i$  is solved. Note that the feasibility of problem  $O_i$  with rate  $p_i$  implies the feasibility of the problem  $O_i$  with the next rate as shown by the next analysis. Namely, if  $p_i \leq \Phi(p_{i-1})$  then  $w = w_i$ ,  $\Phi_i = \Phi_{i-1}$  is a solution, and if  $p_i > \Phi(p_{i-1})$ , then  $w = \Phi_{i-1}^{-1}(p_i)$ ,  $\Phi_i = \Phi_{i-1}$  is as well. Furthermore, both cases lead to a performance ratio of at least  $r$  in case the next rate equals 1 and is the last rate. We hence conclude, that either one of the reservation rates is greater or equal than  $M$  or ADA-PO successfully achieves a performance ratio of  $r$  for each rate ( $w_i < 1$  was a solution for each problem). We conclude then that ADA-PO is  $r$ -robust.

We will now prove that ADA-PO is  $c(r)$ -consistent. We must prove that for every error-free sequence the performance ratio is at most  $c(r)$ . Let  $A'$  be any Pareto-Optimal algorithm. When observing rates below  $\hat{p}$ , ADA-PO follows the threat-based policy, hence for every error-free sequence, its budget is at least the same as  $A'$  when a rate equal to  $\hat{p}$  is exhibited. Then by solving the optimization problem, ADA-PO exchanges the most it can in order to remain  $r$ -robust, a larger amount would make the problem infeasible. In other words, there would not exist a function  $\Phi$  satisfying the constraints, and the continuously increasing function from  $\hat{p}$  to  $M$  will lead to a performance ratio bigger than  $r$ . Hence, no other algorithm could achieve a better profit. We conclude that ADA-PO is  $c(r)$ -consistent.

We finally prove that ADA-PO dominates  $A'$ . By the previous analysis, when observing the first rate above the prediction, ADA-PO has a budget at least the budget than  $A'$ . As ADA-PO exchanges the most it can to remain  $r$ -robust, it will obtain a next utilization which is equal or smaller than  $A'$ , hence achieving a better profit, because  $A'$  exchanged the same or less at lower rates. If  $A'$  has behaved the same as ADA-PO, then this process repeats for every following rate. We conclude then that ADA-PO dominates or performs equally to  $A'$ .  $\square$

**Remark C.1.** To conclude we offer an intuitive explanation of dominance. If the maximum rate of the sequence is below the prediction, then ADA-PO's profit will be smaller or equal than any other Pareto-Optimal algorithm. Its profit will be equal if the sequence is a continuously increasing one. Moreover, for the first rate equal or greater than the prediction, its profit will be greater or equal than any other Pareto-Optimal algorithm. By definition of dominance, while observing rates above the prediction, either the two profits will be equal, or ADA-PO's profit is larger, unless the Pareto-Optimal algorithm attained a smaller profit at an earlier rate.

## D Profile-based contract scheduling

In this section, we discuss another application of our profile-based framework of Section 3. Specifically, we focus on another well-known optimization problem that has been studied under learning-augmented settings, namely contract scheduling. In its standard variant, the problem consists of finding an increasing sequence  $X = (x_i)_{i=0}^{\infty}$  which minimizes the *acceleration ratio*, formally defined as

$$\text{acc}(X) = \sup_T \frac{T}{\ell(X, T)}. \quad (\text{D.1})$$

where  $\ell(X, T)$  denotes the *largest* contract completed by  $T$  in  $X$ , namely

$$\ell(X, T) = \max_j \{x_j : \sum_{i=0}^j x_i \leq T\}.$$

Contract scheduling is a classic problem that has been studied under several settings. In its simplest variant stated above, the optimal acceleration ratio is equal to 4 [37], but many more complex settings have been studied in the literature; see [7] and references therein. In this section we are interested in the learning augmented setting introduced in [7] in which there is a *prediction*  $\tau$  on the interruption time  $T$ . The *prediction error* is defined as  $\eta = |T - \tau|$ . In this context, the consistency  $c(X)$  of schedule  $X$  is defined as

$$c(X) = \frac{\tau}{\ell(X, \tau)},$$

whereas its robustness is defined as

$$r(X) = \sup_{T \geq 1} \frac{T}{\ell(X, T)},$$

985 i.e., the worst-case performance of  $X$ , assuming adversarial interruptions. Since the latter occur  
 986 arbitrarily close to the completion time of any contract, we obtain an equivalent interpretation of the  
 987 robustness as

$$r(X) = \sup_{i \geq 1} \frac{\sum_{j=0}^i x_j}{x_{i-1}}.$$

988 In [7] it was shown that the optimal consistency of a 4-robust schedule is equal to 2. However, as  
 989 proven in [5], any such schedule suffers from brittleness. Namely, for any  $\epsilon > 0$ , there exists a  
 990 prediction  $\tau$  and an actual interruption time  $T$  such that  $|T - \tau| = \epsilon$ , and any 4-robust and 2-consistent  
 991 schedule satisfies  $\ell(X, T) \leq \frac{T + \epsilon}{4}$ .

992 In the remainder of this section we will show how to use our framework of profile-based performance  
 993 so as to remedy this drawback. For definiteness, and to illustrate the application of the techniques, we  
 994 consider the requirement that the performance of the schedule degrades linearly as a function of the  
 995 prediction error. Namely, suppose that we require that  $f(X, T) := T/\ell(X, T)$  be respect a profile  
 996  $F_\phi$ , where the latter is defined as a symmetric, bilinear function that is decreasing for  $T \leq \tau$ , and  
 997 increasing for  $T \geq \tau$ , with slope  $\phi$ , as illustrated in Figure 4. This profile is chosen by the schedule  
 998 designer, and the angle  $\phi$  captures the “smoothness” at which the schedule is required to degrade as a  
 999 function of the prediction error.

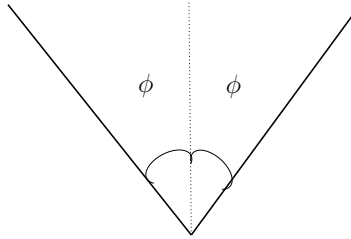

Figure 4: An illustration of the profile  $F_\phi$ .

1000 More specifically, for a given prediction  $\tau$ , and a profile  $F_\phi$  as above, we are interested in finding the  
 1001 best extension of  $F_\phi$  such that there exists a 4-robust schedule that respects the extension. We can  
 1002 thus define the analytical concept of *consistency according to  $F_\phi$*  as

$$c_{F_\phi} := \sup_{\tau} \inf_T \frac{T}{\ell(X, T)} : X \text{ respects } F_\phi.$$

1003 The following theorem states our main result.

1004 **Theorem D.1.** Given a profile  $F_\phi$  and a prediction  $\tau$  on an interruption time, we can compute a  
 1005 4-robust schedule that respects  $F_\phi$  and has optimal consistency according to  $F_\phi$ .

1006 *Proof.* We will assume that  $X$  is of the form  $(\lambda 2^i)_{i \in \mathbb{Z}}$ . This is not a limiting assumption, as discussed  
 1007 in [5], and its purpose is to simplify the calculations. Since any 4-robust schedule is of the above  
 1008 form [5], it will suffice to compute a  $\lambda$  that satisfies the constraints of our problem, and the result will  
 1009 follow.

1010 Recall that  $f(X, T)$  denotes the function  $T/\ell(X, T)$ . By definition, for every  $i \in \mathbb{N}$ ,  $f(X, T)$  is  
 1011 a linear, increasing function of  $T$  function in the interval  $I_k = [T_k, T_{k+1}] = [\lambda 2^k, \lambda 2^{k+1}]$ , with  
 1012 smallest value equal to 2, and largest value equal to 4.

1013 With the above observation in mind, for a given, fixed  $\lambda$ , let  $k$  be such that  $\tau \in I_{k+1}$ , i.e., we have  
 1014 that  $\ell(X, \tau) = \lambda 2^k$ . Define  $\alpha \in [1, 2]$  to be such that  $\tau = \alpha T_k$ , and note that by construction,  $\alpha$  is a  
 1015 function of  $\lambda$ . Moreover

$$f(X, \tau) = \frac{\tau}{\lambda 2^k} = \frac{\alpha T_k}{\lambda 2^k} = \frac{\alpha \lambda 2^{k+1}}{\lambda 2^k} = 2\alpha, \quad (\text{D.2})$$

1016 which implies that it suffices to compute  $\alpha$ , then  $\lambda$  must be chosen so that  $\lambda = 2^{\{\log(2\alpha)\}}$ , where  $\{x\}$   
 1017 denotes the fractional part of  $x$ .

1018 In order to minimize  $f$ , subject to  $X$  respecting the profile,  $\lambda$  must be chosen such that one of the  
 1019 two cases occur, which we analyze separately.

1020 *Case 1.* The profile  $F_\phi$  has a unique intersection point with  $f$  at  $T = \tau$ , and moreover  $F(T_k + \epsilon) = 4$ ,  
 1021 for infinitesimally small  $\epsilon > 0$ . This situation is illustrated in Figure 5. For this case to arise, and for  
 1022 the schedule to be consistent with  $F$ , it must be that

$$\tan\left(\frac{\pi}{2} - \phi\right) \geq \frac{4 - 2}{T_{k+1} - T_k} = \frac{2}{T_k} = \frac{2\alpha}{\tau}. \quad (\text{D.3})$$

1023 It must then be that  $f(X, \tau) + \frac{\tau - T_k}{\tan \phi} = 4$ , hence

$$4 - \rho\left(1 - \frac{1}{\alpha}\right) = 2\alpha, \text{ where } \rho = \frac{\tau}{\tan \phi}.$$

1024 Solving the above equality for  $\alpha$  minimizes  $f$ , by means of (D.2). We obtain that

$$\alpha = \frac{1}{4}(\sqrt{\rho^2 + 16} - \rho + 4) \text{ and } f(X, \tau) = 2\alpha,$$

1025 subject to the condition (D.3).

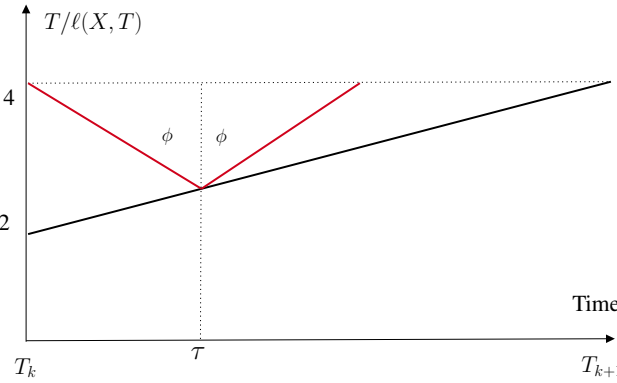

Figure 5: An illustration of Case 1.

1026 *Case 2.* This case occurs if the condition in Case 1 does not apply. The profile  $F_\phi$  is such that  
 1027  $F(T_k + \epsilon) = F(T_{k+1} - \epsilon)4r$ , for infinitesimally small  $\epsilon > 0$ . This situation is illustrated in Figure 6.  
 1028 For this case to arise, and for the schedule to respect  $F_\phi$  it must be that  $\tau = \frac{T_{k+1} + T_k}{2} = \frac{3}{2} \frac{\tau}{\alpha}$ , hence  
 1029  $\alpha = 3/2$ . In this case, we obtain that

$$f(X, \tau) = 4 - \frac{T_{k+1} - \tau}{\tan \phi} = 4 - \rho, \text{ where } \rho = \frac{\tau}{\tan \phi}.$$

1030

□

1031 We observe that in both cases in the analysis of Theorem D.1 we obtain that  $f \in (2, 4]$ , as a function  
 1032 of  $\tau$  and  $\phi$ . This result makes intuitively sense, since  $X$  is 4-robust, and the smallest consistency is  
 1033 equal to 2 (when  $\phi \rightarrow 0$ ).

## 1034 E Further experimental analysis

1035 To further quantify the performance difference between the two algorithms, PROFILE and PO, we  
 1036 performed additional experiments. Specifically, we used a list of the last 20,000 minute-exchange  
 1037 rates of BTC to USD, so as to create 20 different sequences, each with its own prediction, using the  
 1038 same method as in Fig 2c. For each sequence, we computed the average improvement over PO for  
 1039 rates in the interval of interest  $[0.9\hat{p}, 1.1\hat{p}]$ . Figure 7 depicts this average for each of the 20 sequences.  
 1040 We observe that for the sequences in which PROFILE outperforms PO (12 out of 20), the improvement  
 1041 ranges from roughly 15% to 30%, whereas PO outperforms PROFILE in 8 out of 20 sequences, by a  
 1042 factor that is at most 10%, roughly.



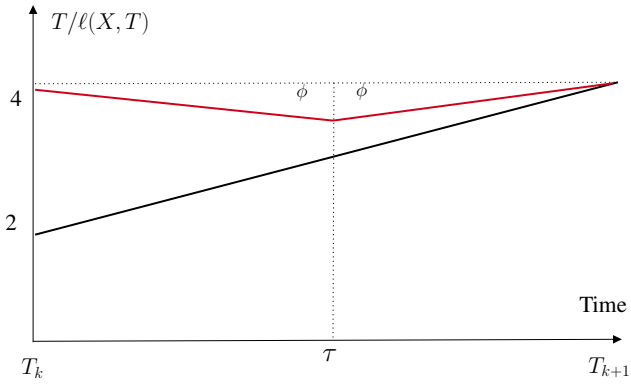

Figure 6: An illustration of Case 2.

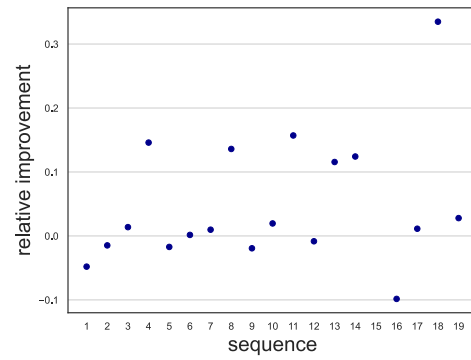

Figure 7: Average ratio improvement of PROFILE over PO

## 1043 **F Computational setup**

1044 The experiments are reproducible on any computer with the experimental setup described in the  
 1045 README file. They do not require any memory or computational power beyond the standard  
 1046 requirements. They run typically on few milliseconds.
